# Supplementary material for: Grating of single Lu@C82 molecules using supramolecular network
Source: Royal Society of Chemistry journal article supplement (doi:10.1039/b809004a), 2008-01-01
Supplement: b809004a.pdf [file b809004a.pdf]

**Title:** Grating of single Lu@C<sub>82</sub> molecules using supramolecular network

**Authors:** F. Silly, A. Q. Shaw, K. Porfyrakis, J. H. Warner, A. A. R. Watt, M. R. Castell, H. Umemoto, T. Akachi, H. Shinohara, and G. A. D. Briggs

**Supporting information:**

Characterization of the Lu@C<sub>82</sub> molecules:

The purity of the Lu@C<sub>82</sub> molecules has been checked by mass spectrometry and by UV-Vis-NIR absorption.

Fig.1 shows the positive mass spectrum on the isolated Lu@C<sub>82</sub>, HPLC fraction.

The corresponding negative mass spectrum is presented Fig.2.

The mass spectra were taken with the MALDI technique without any matrix.

Fig.3 shows UV-Vis-NIR absorption spectra for isolated Y@C<sub>82</sub>, La@C<sub>82</sub> and Lu@C<sub>82</sub> for comparison. The fullerenes were in suspension in CS<sub>2</sub> solution during the recording of the UV-vis-NIR spectra.

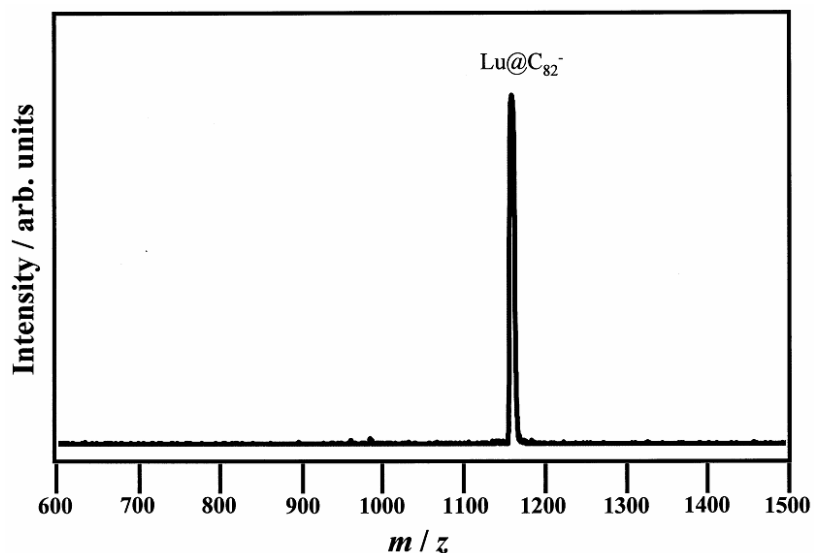

Fig.1: Positive mass spectrum on the isolated Lu@C<sub>82</sub>

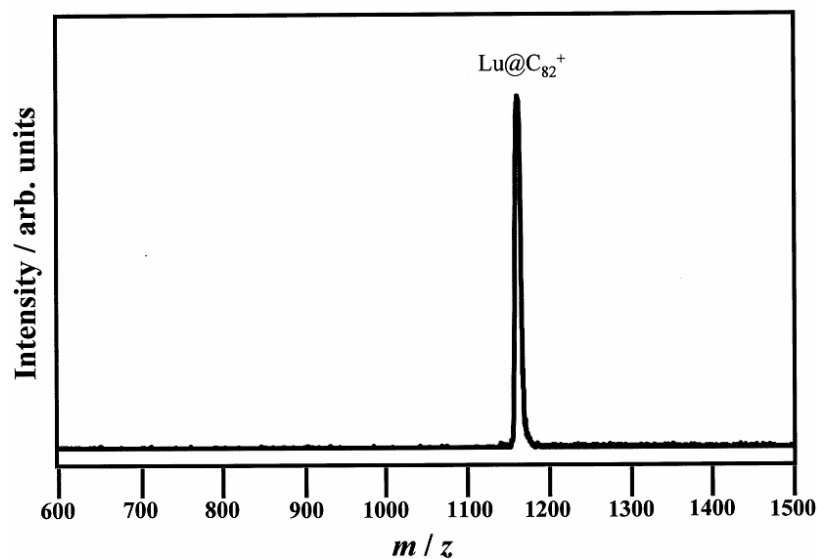

Fig.2: negative mass spectrum on the isolated Lu@C82

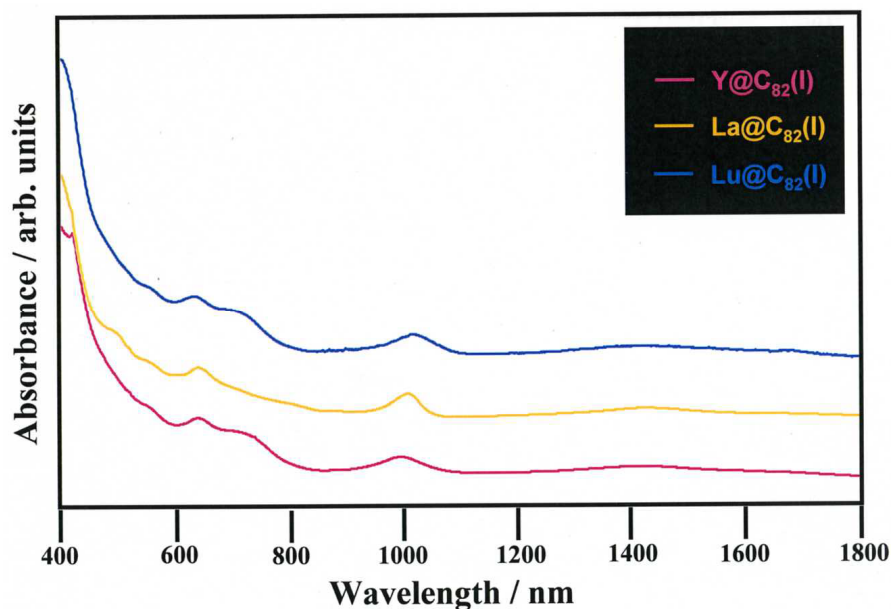

Fig.3: UV-Vis-NIR absorption spectra for isolated Y@C82, La@C82 and Lu@C82.

Procedure to form the Lu@C82-PTCDI-melamine network:

In a first step, PTCDI molecules have been sublimated onto a room temperature gold substrate. In a second step, the melamine molecules have been sublimated onto this room temperature substrate.

In a third step, the gold substrate supporting the PTCDI and melamine molecules has been annealed at 150°C for 10 h to form the PTCDI-melamine supramolecular network.

Once the substrate has been cooled down to room temperature, the Lu@C82 molecules have been sublimated. No post annealing has been performed after this step.

Procedure to form the Lu@C<sub>82</sub> close-packed domains:

The Lu@C<sub>82</sub> molecules have been sublimated onto a room temperature gold substrate. No post annealing has been performed after this step.
